# Supplementary material for: A multi-centre metal-free COF@g-C3N4 catalyst assembled with covalent bonds for photocatalytic CO2 reduction
Source: Royal Society of Chemistry journal article supplement (doi:10.1039/d4dt02996h), 2024-12-05
Supplement: d4dt02996h1.pdf [file d4dt02996h1.pdf]

## Supporting Information

### **A multi-centre metal-free COF@g-C<sub>3</sub>N<sub>4</sub> catalyst assembled with covalent bonds for photocatalytic CO<sub>2</sub> reduction**

Xiang Wang<sup>a</sup>, Zhenping Wang<sup>a</sup>, Yanling Liu<sup>a\*</sup>, Wanzhen Peng<sup>a</sup>, Xiangyi Fu<sup>a</sup>, Jie Zhou<sup>a\*</sup>, Lizhi Han<sup>a</sup>, Yingjie Hua<sup>a</sup> and Zi-Yan Zhou<sup>b, c\*</sup>

<sup>a</sup> Key Laboratory of Electrochemical Energy Storage and Energy Conversion of Hainan Province, School of Chemistry and Chemical Engineering, Hainan Normal University, Haikou, Hainan, 571158, China.

<sup>b</sup> Shandong Engineering Research Center of Green and High-value Marine Fine Chemicals, Weifang University of Science and Technology, Shouguang, Shandong, 262700, China.

<sup>c</sup> College of Chemistry and Chemical Engineering, Shandong University of Technology, Zibo, 255000 Shandong, China.

\*Correspondence and requests for materials should be addressed to Y. Liu (email: [Liuyl7809@163.com](mailto:Liuyl7809@163.com)), J. Zhou (email: [920486@hainnu.edu.cn](mailto:920486@hainnu.edu.cn)) and Z.Y. Zhou (email: [zyzhou@sdut.edu.cn](mailto:zyzhou@sdut.edu.cn)).

## Materials and methods

The starting materials for COF syntheses were purchased from Shanghai Tensus Bio-tech Co., Ltd. Other reagents and solvents applied in the synthesis and photocatalysis were purchased from Aladdin and Sigma-Aldrich, and used as received without further pretreatments.

The powder X-ray diffraction (PXRD) spectra were recorded on a D/max 2500 VL/PC X-ray diffractometer (Rigaku SmartLab, Japan) with Cu K $\alpha$  radiation ( $\lambda = 1.5418 \text{ \AA}$ ) at 45 kV, 200 mA. Diffraction intensity data for  $2\theta$  from  $3 \sim 30^\circ$  were collected at the scanning speed of 5 deg/min with  $2\theta$  step increment of  $0.01^\circ$ .

Fourier-transform infrared (FTIR) spectra were obtained from KBr pellets in a wavelength ranging from  $4000\text{-}500 \text{ cm}^{-1}$  on a Thermo Nicolet IS50 FTIR spectrometer.

UV-vis diffuse reflectance spectra (UV-vis DRS) were recorded at room temperature on a HITACHI U-4100 Spectrophotometer.

X-ray photoelectron spectroscopy (XPS) were recorded using a Escalab 250Xi instrument from Thermo Scientific equipped with an Al K $\alpha$  microfocused X-ray source.

Nitrogen gas porosimetry measurements were performed on a automatic volumetric adsorption equipment using a (ASIQM0G002-3) and porosity analyzer after the samples were outgassed under a vacuum at  $100 \text{ }^\circ\text{C}$  for 12 h. Apparent surface areas were determined using BET method.

The emission lifetime measurements were performed on an Edinburgh-State/Transient Fluorescence Spectrometer FLS1000 with an excitation wavelength at 340 nm.

Scanning electron microscope (SEM) images were performed on XL-30 ESEM-FEG. The elemental mappings of the samples were determined by EDX equipped on SEM with the type of Genesis 2000.

TEM and HRTEM images were recorded on a Talos F200i (Thermo Fisher Scientific, USA) transmission electron microscope at an accelerating voltage of 200 kV.

Thermogravimetric analysis of COFs powder samples was performed on a Diamond TG Thermal Analyzer System (Perkin-Elmer, USA) with heating rate of  $10 \text{ }^\circ\text{C min}^{-1}$  from room temperature to  $1000 \text{ }^\circ\text{C}$ .

All the electrochemical measurements were conducted using CHI760E (Chenhua Co., China) electrochemical work-station.

## Photocatalytic experiment and detection

In a quartz reactor (50 mL), the photocatalyst (10 mg),  $\text{CoCl}_2$  (3  $\mu\text{mol}$ ) and bipyridine (bpy, 20 mg) were dispersed in the solution containing acetonitrile,  $\text{H}_2\text{O}$  and triethanolamine (v:v:v = 8:1:1, 30 mL). This mixture system was bubbled with pure  $\text{CO}_2$  gas for 15 min. The temperature of the reaction solution was maintained at 25 °C controlled by an outside flow of water during the reaction. Then, the system was irradiated under simulated sunlight using a 40W LED lamp with  $\lambda = 420 - 800$  nm. Keeping the system airtight throughout the photocatalytic process.

The gaseous products were sampled by an off-line sampling syringe (0.5 mL) and then analysed by gas chromatography. To detect the yield of CO gas, gas (500  $\mu\text{L}$ ) in the middle of the test tube was collected using an off-line sampling syringe and injected into a gas chromatography system equipped with an FID detector using argon as the carrier gas. Retention time of CO was 1.8 min. To detect the formation of  $\text{H}_2$ , the gas (500  $\mu\text{L}$ ) of the test tube was transferred using an off-line sampling syringe and analysed by gas chromatography with TCD detector through a 5 Å molecular sieve column, with ultra-pure argon acting as both carrier and reference gas. Retention time of  $\text{H}_2$  was 1.0 min. The volumes of the CO or  $\text{H}_2$  produced were calculated by comparing the integrated areas of the signals of CO or  $\text{H}_2$  with a calibration curve. The injector and detector temperatures were kept to be 60 °C.

## Electrochemical measurements

All electrochemical characterisations including Mott-Schottky measurements, electrochemical impedance spectroscopy and photocurrent were tested using the following methods.<sup>[1, 2]</sup> Electrochemical measurements of COF@g-C<sub>3</sub>N<sub>4</sub>, COF-TpBb and g-C<sub>3</sub>N<sub>4</sub> were conducted using a three-electrode electrochemical workstation system (CHI 760e). The ITO glass substrate (1 cm × 1 cm) was employed as the working electrode, the Pt wire as the auxiliary electrode and the Ag/AgCl electrode as the reference electrode. The samples (2 mg) were dispersed into the solution (1 mL) containing Nafion solution (100 μL, 0.5 wt%), water (450 μL), and ethanol (450 μL). After sonication, the spreading aqueous slurries were drop-cast onto the ITO glass substrate. Then, the working electrode was dried spontaneously under ambient temperature. 0.2 M Na<sub>2</sub>SO<sub>4</sub> solution was used as the electrolyte. Irradiation was carried out by using a 40W LED lamp with 420-800 nm.

### Synthesis of 1,4-Phenylenebis(thiourea)<sup>[3]</sup>

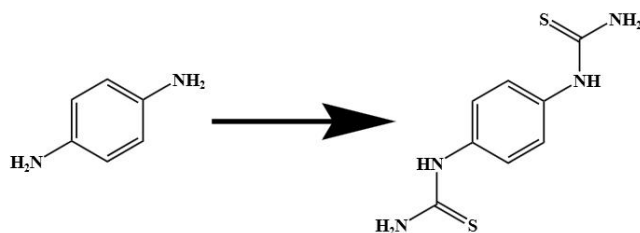

p-phenylenediamine (1.7 g, 15.7 mmol), activated carbon (1 g) and 3 mol L<sup>-1</sup> hydrochloric acid (12 mL, 36 mmol) were added in a 100 mL three-necked flask. After being refluxed for 20 min, the mixture was filtered and the filtrate was removed into another 100 mL three-necked flask with ammonium thiocyanate (4.84 g, 63.6 mmol). After being heating at 95°C for 24 h, the solid product was collected by filtration and dried at 30°C in vacuum overnight.

### Synthesis of 2,6-diaminobenzo[1,2-d:4,5-d']bisthiazole (Bb-NH<sub>2</sub>)<sup>[3]</sup>

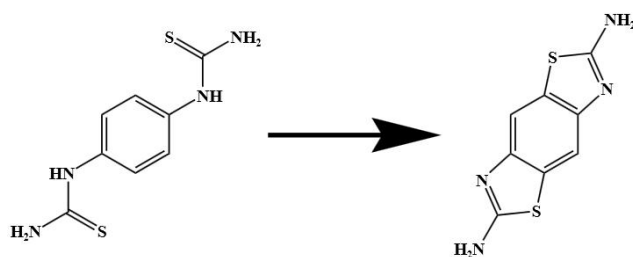

A solution of 1,4-Phenylenebis(thiourea) (2 g, 8.9 mmol) and trichloromethane (10 mL) were added into a 100 mL three-necked flask. Subsequently, a solution of trichloromethane (10 mL) containing liquid bromine (1.05 mL, 20.5 mmol) was added slowly into the mixture via a long-neck funnel, under stirring conditions. The temperature of the mixture was maintained at a maximum of 40 °C. The suspension was stirred at room temperature for 12 h and refluxed for 24 h, then filtered and washed with trichloromethane (20 mL) for 4 times. The obtained solid and 20% sodium hydrogen sulfite solution (20 mL) were added into a 250 mL three-necked flask and stirred at 90°C. After filtration, the solid and 4 mol L<sup>-1</sup> hydrochloric acid (25 mL, 100 mmol) were mixed and heated for 30 min. After filtration, the filtrate was neutralized with aqueous ammonia to pH = 7. The suspension was filtered and washed twice with methanol. The obtained solid was dried in vacuum at 35 °C.

## Synthesis of COF-TpBb

TpBb-COF was synthesized by the previously reported method with modification.<sup>[3, 4]</sup> A glass tube of 25 mL measuring 10 × 200 mm (o.d × length) was charged with Bb-NH<sub>2</sub> (33 mg, 0.15 mmol), Tp-CHO (21 mg, 0.1 mmol), 1,4-dioxane (0.75 mL), mesitylene (0.25 mL) and 6 M glacial acetic acid (0.1 mL). The mixture was sonicated for 30 min and then flash frozen in a liquid nitrogen bath at 77 K. After three freeze-pump-thaw cycles, the tube was sealed under vacuum and heated at 120°C for 72 h under stationary condition. The precipitate at the bottom of the tube obtained from the reaction was collected by filtration, and then washed with dichloromethane and acetone, respectively. Finally, the product was dried at 100 °C under vacuum for 24 h to obtain a red solid as activated COF-TpBb.

### **Synthesis of g-C<sub>3</sub>N<sub>4</sub>**

The synthesis of g-C<sub>3</sub>N<sub>4</sub> was carried out using a previously reported method with slight modification.<sup>[5]</sup> The urea powder (10 g) was placed in a covered alumina crucible and heated to 550°C at a heating rate of 5°C·min<sup>-1</sup> in a muffle furnace. The temperature was maintained for 4 h and then cooled to 25°C to obtain pure g-C<sub>3</sub>N<sub>4</sub>.



## Synthesis of COF@g-C<sub>3</sub>N<sub>4</sub>-X

The COF@g-C<sub>3</sub>N<sub>4</sub>-0.2 composite photocatalyst was prepared as follows: the prepared COF-TpBb (20 mg) and g-C<sub>3</sub>N<sub>4</sub> (80 mg) were ground for 30 min. The ground powder was dispersed in ethanol and water (v:v = 1:1, 50 mL) and stirring under room temperature for 12 h to form a suspension. Then, the suspension was transferred to a high-temperature and high-pressure resistant glass reactor (100 mL) and heated in an oven at 100 °C for 12 h. After naturally cooling down to room temperature, the pink powder was collected by vacuum filtration and washed thoroughly with distilled water and ethanol, and then dried at 100°C for 12 h under vacuum.

The synthesis procedure of COF@g-C<sub>3</sub>N<sub>4</sub>-X (X = 0.05/0.1/0.3) was the same as that of COF@g-C<sub>3</sub>N<sub>4</sub>-0.2, except that the mass of COF-TpBb:g-C<sub>3</sub>N<sub>4</sub> = 1:4 were replaced by 1:19/1:9/3:7.

## Computational methods

The calculation model is constructed by a finite cluster structure, and all calculations were performed with the Gaussian 16 software package. The ground state of [Cat.] was geometrically optimized by using 6-31G\* basis sets. ESP analysis, TDDFT calculations, and orbital composition were also performed at the same level. In order to obtain the corresponding excited state energies, TDDFT calculations were performed on the basis of optimized ground state configurations. The energy of [Cat.] is specified as 0.000 eV, and the  $\Delta E$  (eV) calculations for the other states.<sup>[6-8]</sup>

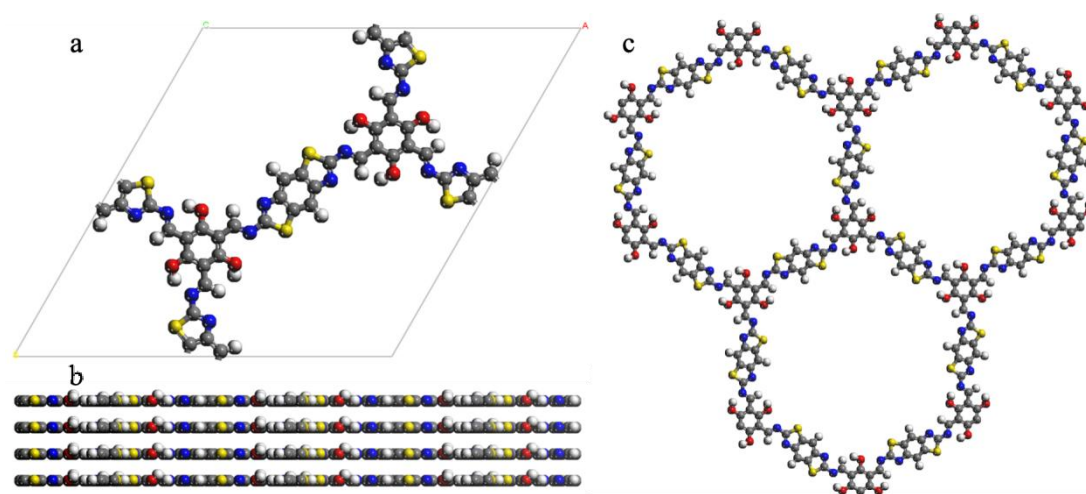

Figure S1. Space-filling model showing AA stacking: unit cell (a), side view (b) and top view (c); carbon (gray), nitrogen (blue), oxygen (red) and sulfur (yellow).

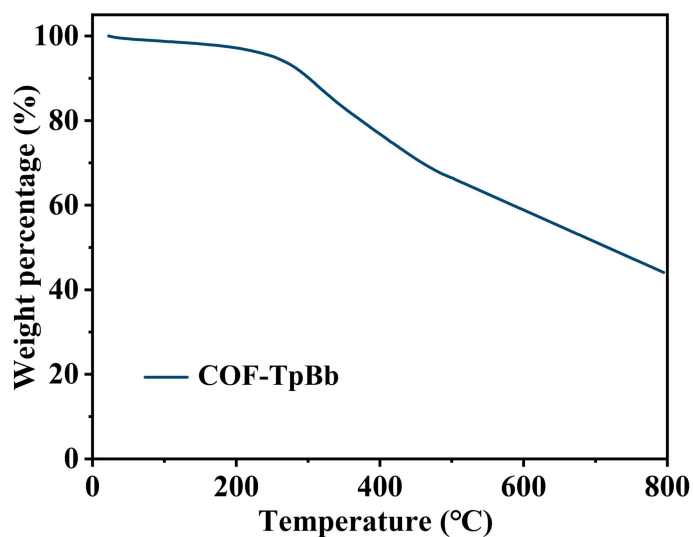

Figure S2. TGA curve of COF-TpBb under N<sub>2</sub> atmosphere.

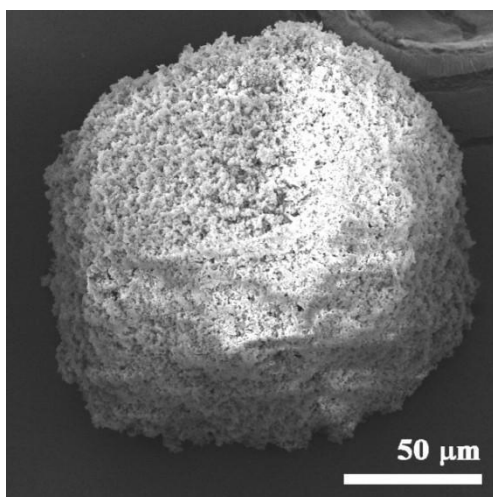

Figure S3. SEM images of Tp-CHO.

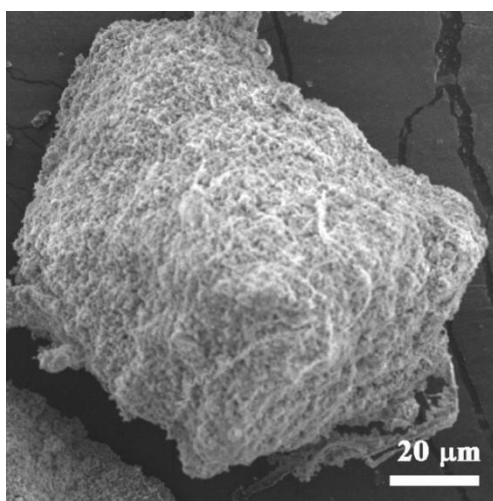

Figure S4. SEM images of Bb-NH<sub>2</sub>.

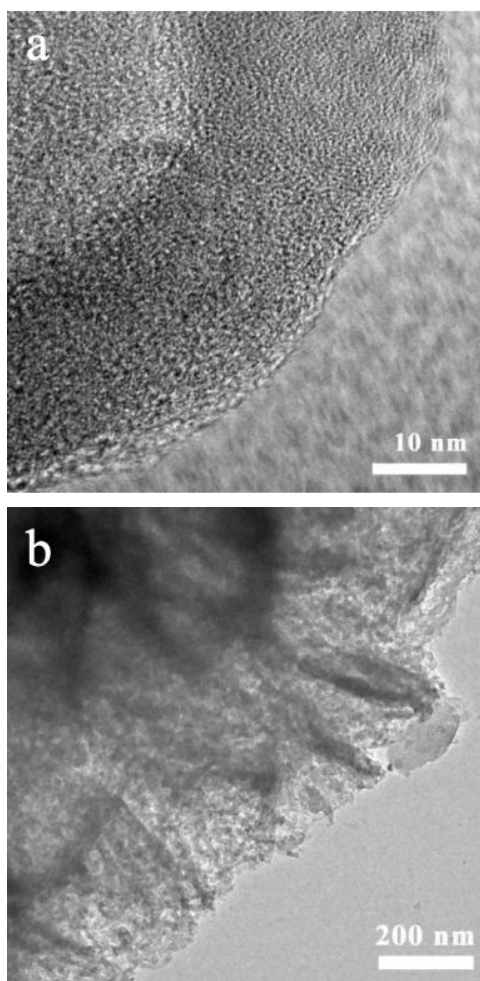

Figure S5. TEM images of COF-TpBb. **a** 10nm, **b** 200 nm.

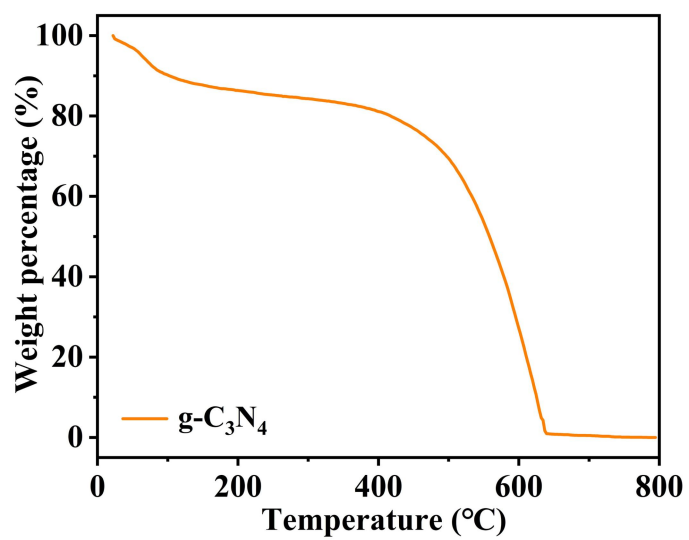

Figure S6. TGA curve of g-C<sub>3</sub>N<sub>4</sub> under N<sub>2</sub> atmosphere.

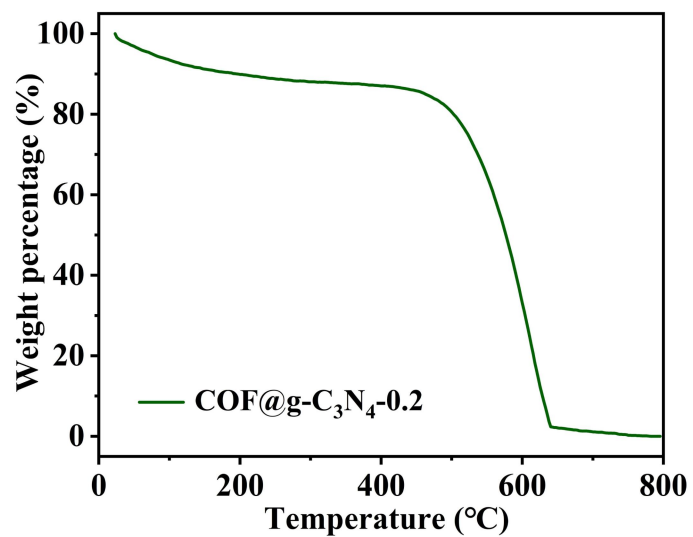

Figure S7. TGA curve of COF@g-C<sub>3</sub>N<sub>4</sub>-0.2 under N<sub>2</sub> atmosphere.

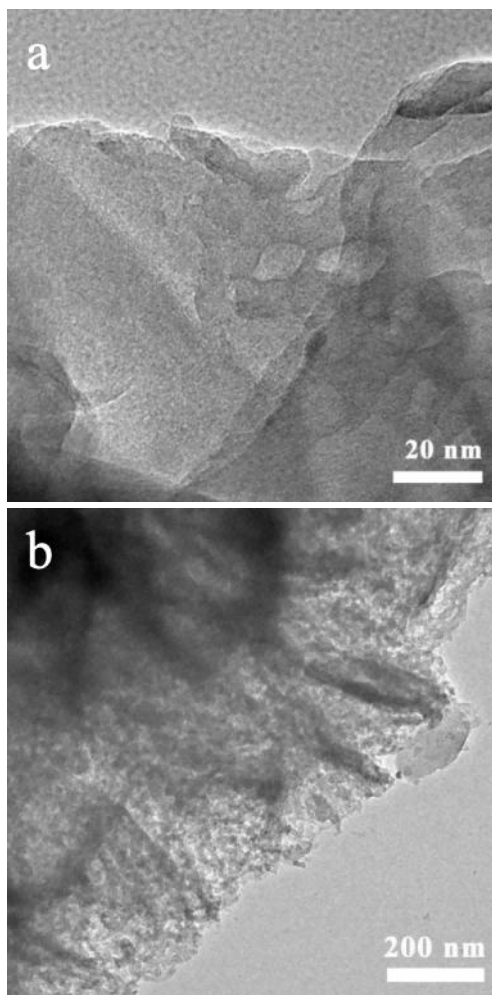

Figure S8. TEM images of g-C<sub>3</sub>N<sub>4</sub>. **a** 20nm, **b** 200 nm.

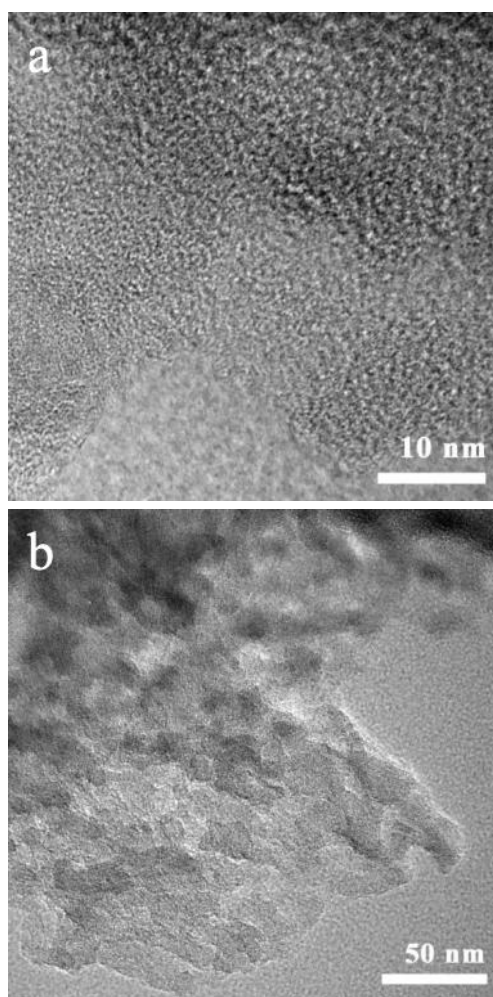

Figure S9. TEM images of COF@g-C<sub>3</sub>N<sub>4</sub>-0.2. **a** 10nm, **b** 50 nm.

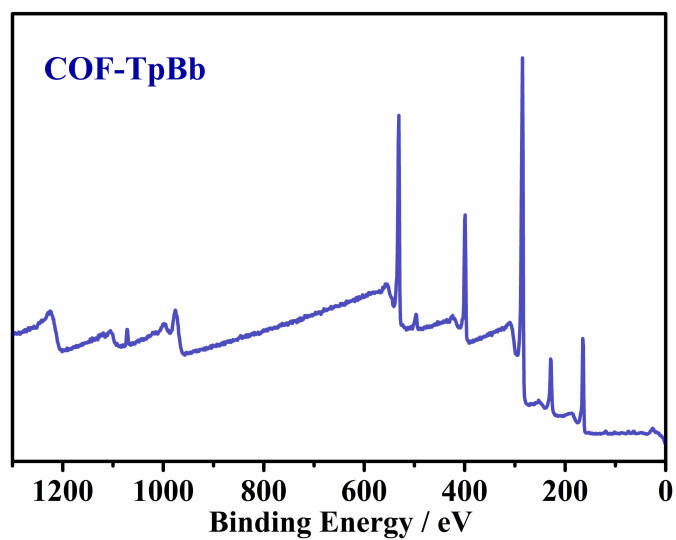

Figure S10. The XPS fitting of all elements of COF-TpBb.

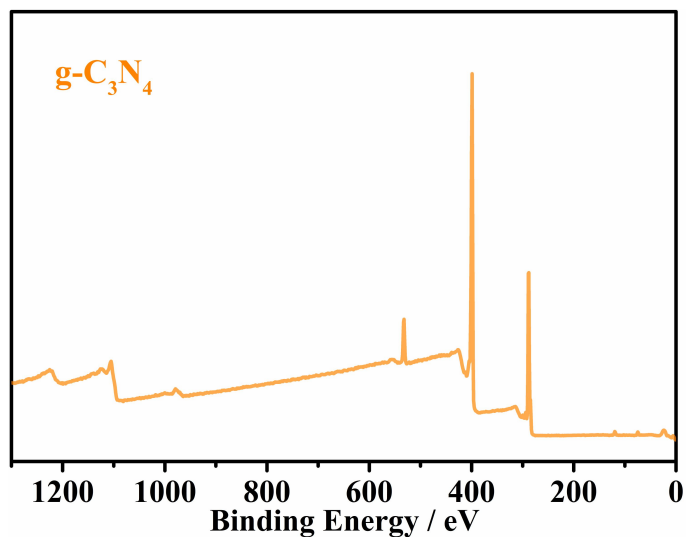

Figure S11. The XPS fitting of all elements of  $g\text{-C}_3\text{N}_4$ .

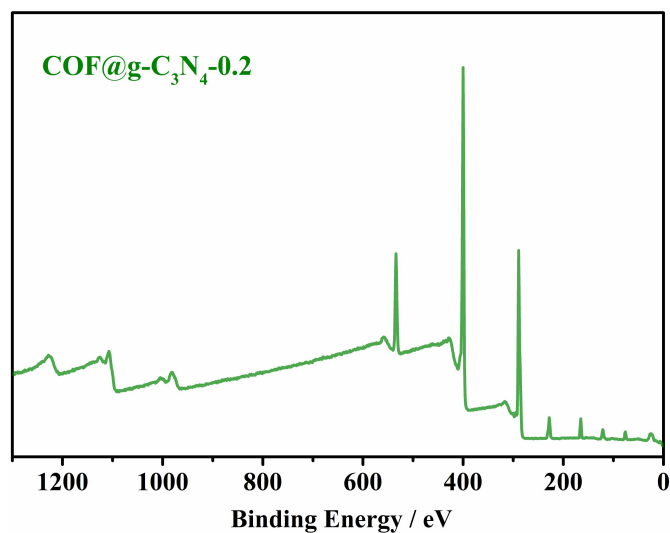

Figure S12. The XPS fitting of all elements of  $\text{COF}@g\text{-C}_3\text{N}_4\text{-0.2}$ .

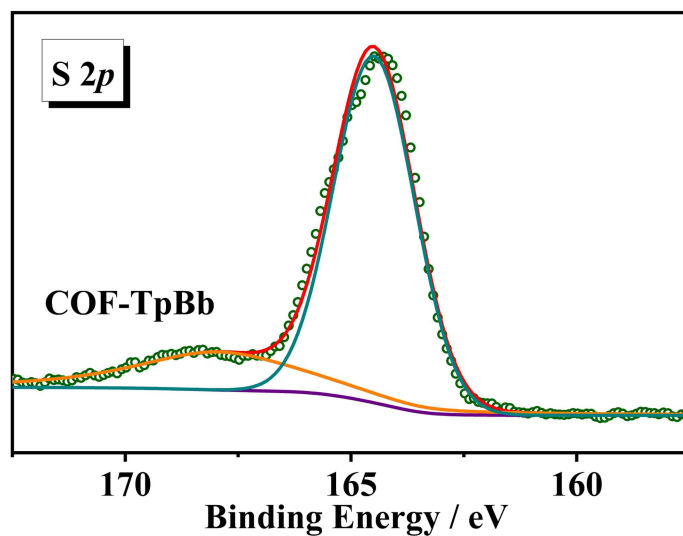

Figure S13. X-ray photoelectron spectroscopy (XPS) of S 2p for COF-TpBb.

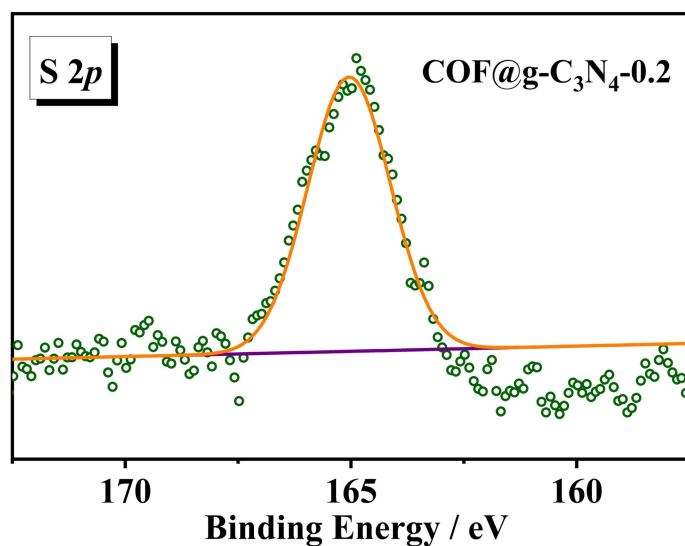

Figure S14. X-ray photoelectron spectroscopy (XPS) of S 2p for COF@g-C<sub>3</sub>N<sub>4</sub>-0.2.

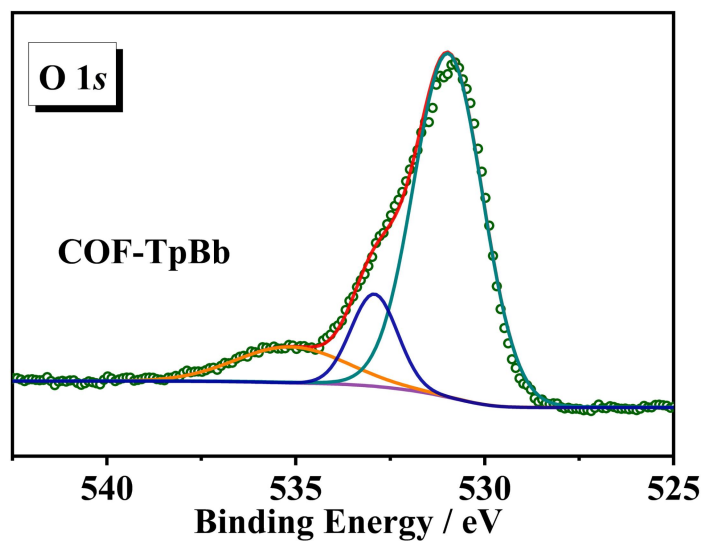

Figure S15. X-ray photoelectron spectroscopy (XPS) of O 1s for COF-TpBb.

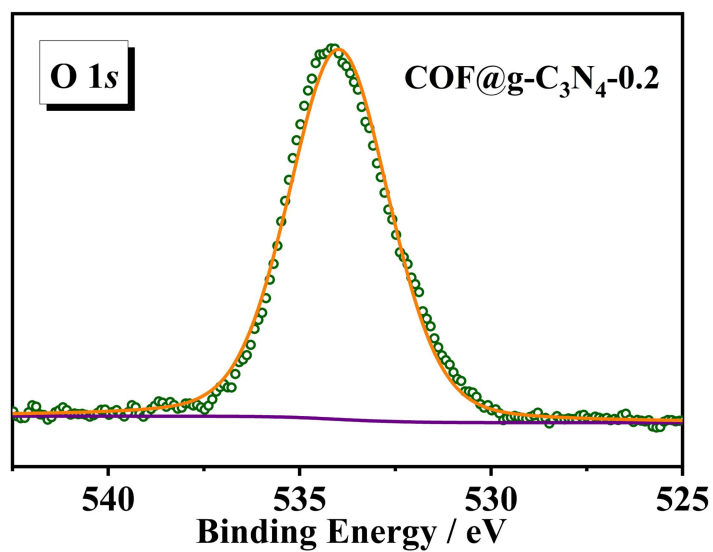

Figure S16. X-ray photoelectron spectroscopy (XPS) of O 1s for COF@g-C<sub>3</sub>N<sub>4</sub>-0.2.



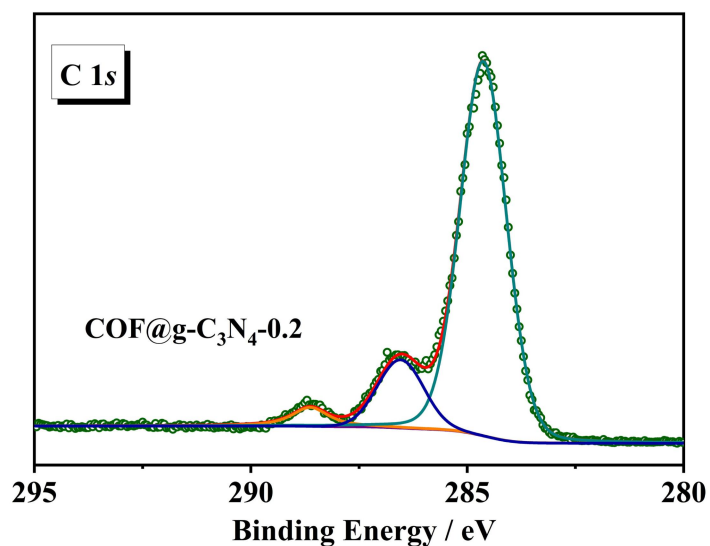

Figure S17. X-ray photoelectron spectroscopy (XPS) of C 1s for COF@g-C<sub>3</sub>N<sub>4</sub>-0.2.

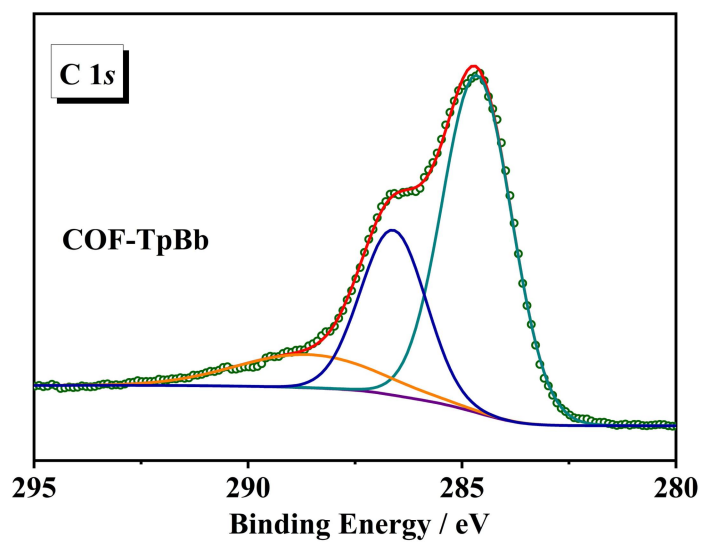

Figure S18. X-ray photoelectron spectroscopy (XPS) of C 1s for COF-TpBb.

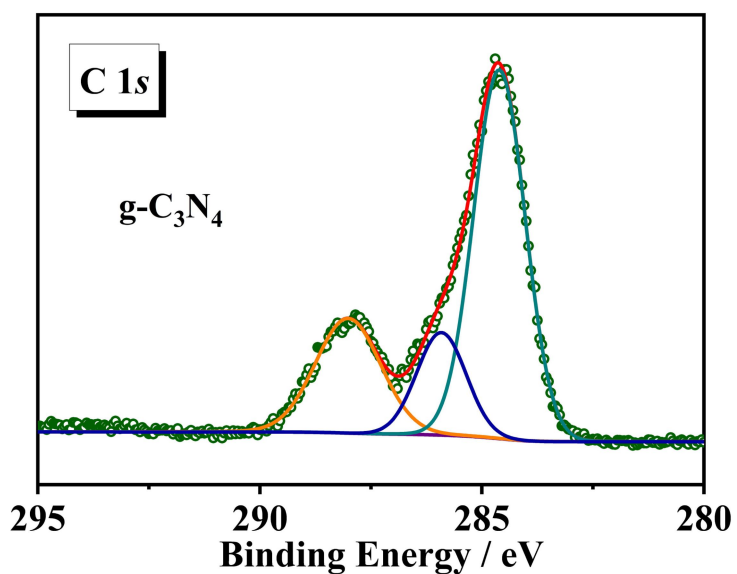

Figure S19. X-ray photoelectron spectroscopy (XPS) of C 1s for g-C<sub>3</sub>N<sub>4</sub>.

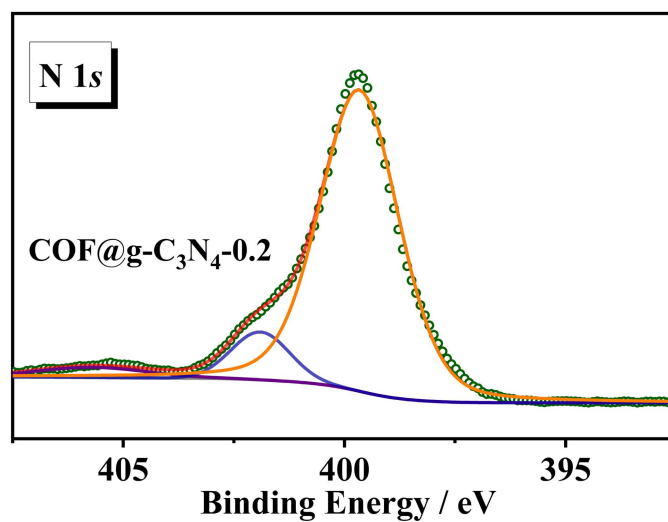

Figure S20. X-ray photoelectron spectroscopy (XPS) of N 1s for COF@g-C<sub>3</sub>N<sub>4</sub>-0.2.

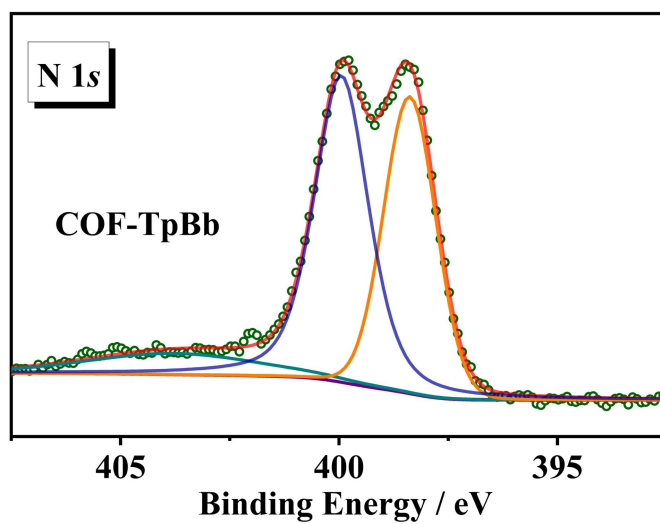

Figure S21. X-ray photoelectron spectroscopy (XPS) of N 1s for COF-TpBb.

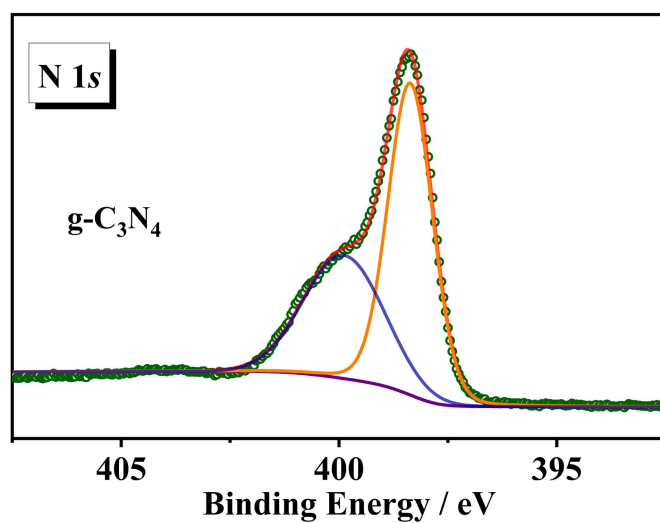

Figure S22. X-ray photoelectron spectroscopy (XPS) of N 1s for g-C<sub>3</sub>N<sub>4</sub>.

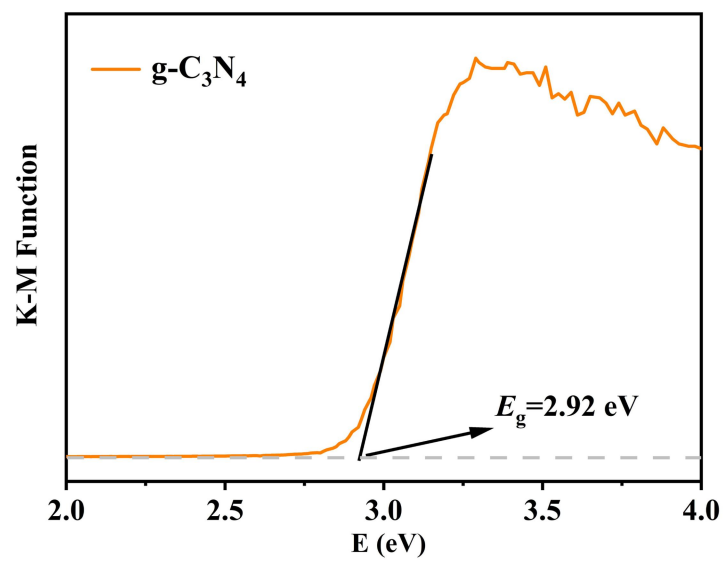

Figure S23. Tauc plot for g-C<sub>3</sub>N<sub>4</sub>.

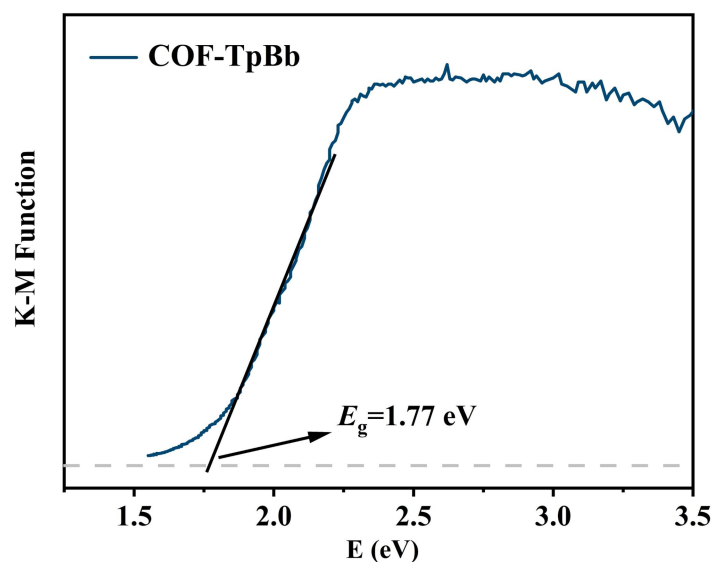

Figure S24. Tauc plot for COF-TpBb.

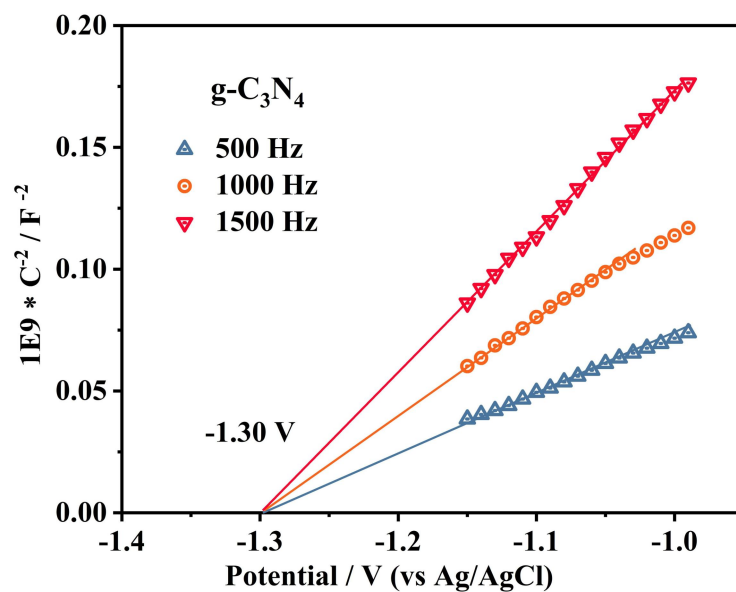

Figure S25. Mott-Schottky plots for g-C<sub>3</sub>N<sub>4</sub> in 0.1 M Na<sub>2</sub>SO<sub>4</sub> aqueous solution.

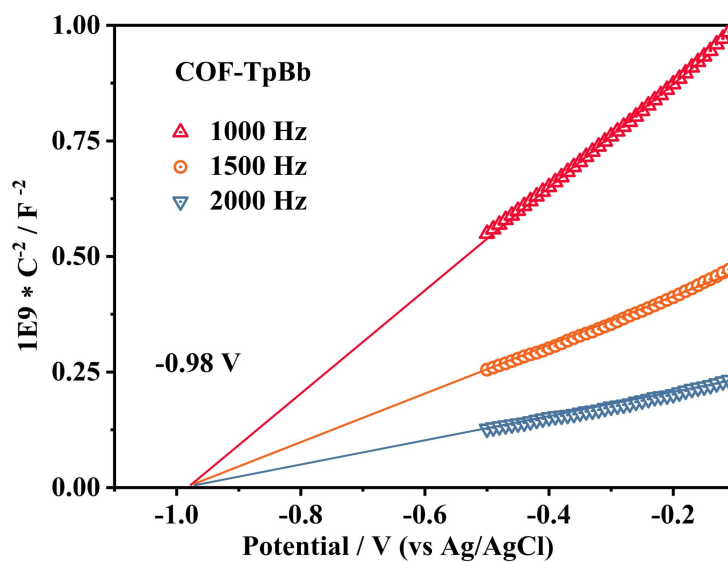

Figure S26. Mott-Schottky plots for COF-TpBb in 0.1 M Na<sub>2</sub>SO<sub>4</sub> aqueous solution.

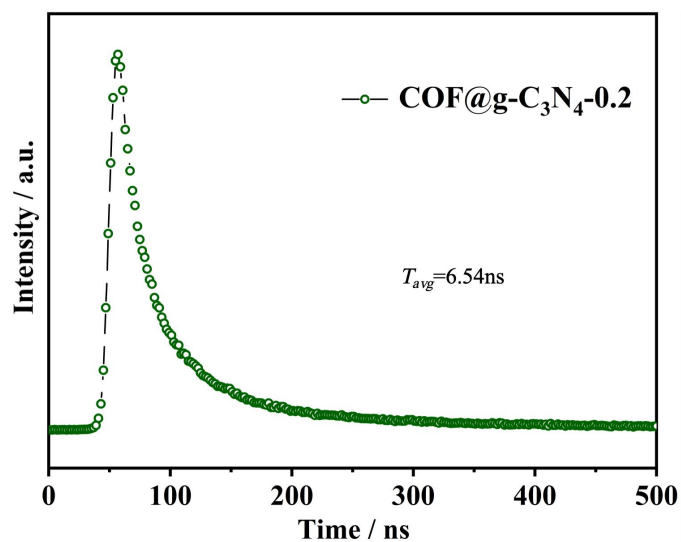

Figure S27. Time-resolved fluorescence decay spectroscopy of COF@g-C<sub>3</sub>N<sub>4</sub>-0.2.

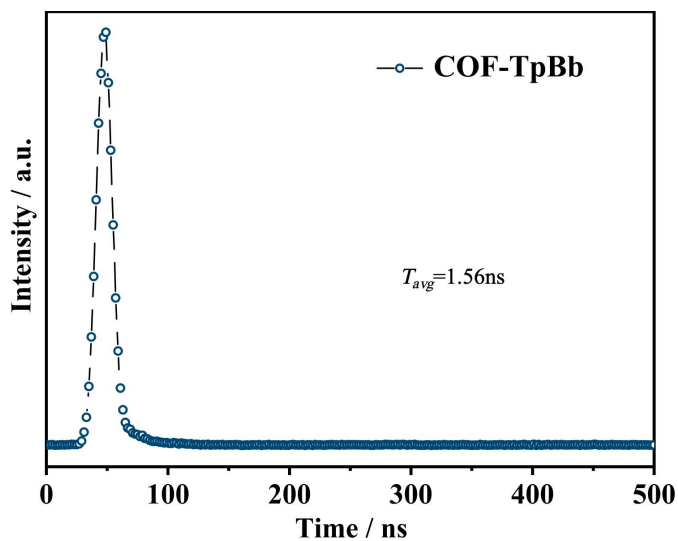

Figure S28. Time-resolved fluorescence decay spectroscopy of COF-TpBb.

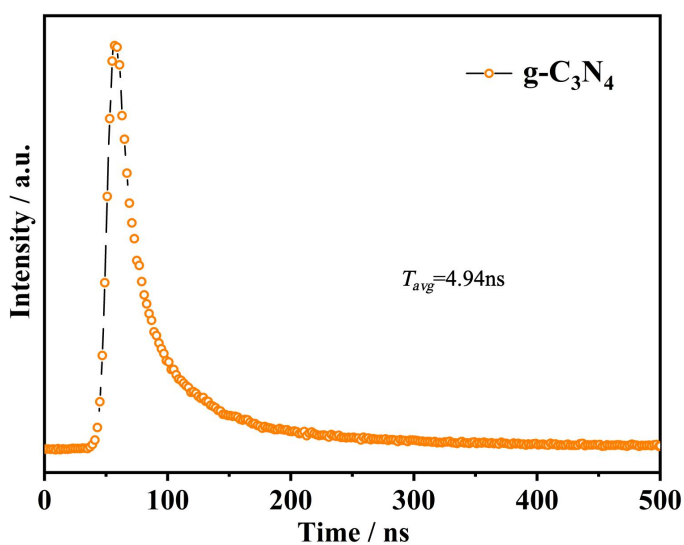

Figure S29. Time-resolved fluorescence decay spectroscopy of g-C<sub>3</sub>N<sub>4</sub>.

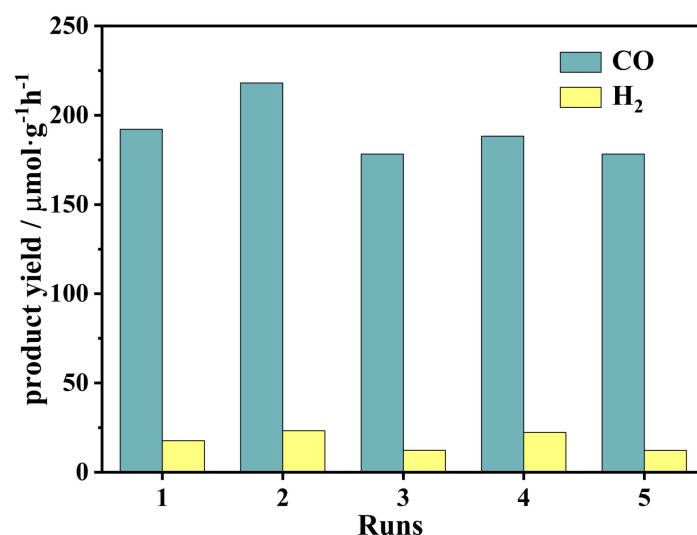

Figure S30. The yield of CO and H<sub>2</sub> with catalysis experiments of the same catalyst in different batches.

Table S1 Summary of related work based on g-C<sub>3</sub>N<sub>4</sub> materials for photocatalytic CO<sub>2</sub> reduction

| Photocatalyst                                    | Solvent          | PS   | Light source            | Products(CO)                                               | Ref       |
|--------------------------------------------------|------------------|------|-------------------------|------------------------------------------------------------|-----------|
| CuInS <sub>2</sub> /PCN                          | H <sub>2</sub> O | TEOA | 300 W Xe lamp           | 105.89 $\mu\text{mol}\cdot\text{g}^{-1}\cdot\text{h}^{-1}$ | 9         |
| O/La-CN                                          | MeCN             | TEOA | 300 W Xe lamp           | 92 $\mu\text{mol}\cdot\text{g}^{-1}\cdot\text{h}^{-1}$     | 10        |
| Co <sub>4</sub> @g-C <sub>3</sub> N <sub>4</sub> | MeCN             | TEOA | 300 W Xe lamp           | 89.6 $\mu\text{mol}\cdot\text{g}^{-1}\cdot\text{h}^{-1}$   | 11        |
| CoO <sub>x</sub> /MCN                            | MeCN             | TEOA | 300 W Xe lamp           | 10.2 $\mu\text{mol}\cdot\text{g}^{-1}\cdot\text{h}^{-1}$   | 12        |
| mpg-CN <sub>x</sub>   CoPP <sub>C11.9</sub>      | MeCN             | TEOA | 400 W Hg lamp           | 12.4 $\mu\text{mol}\cdot\text{g}^{-1}\cdot\text{h}^{-1}$   | 13        |
| WO <sub>3</sub> /g-C <sub>3</sub> N <sub>4</sub> | H <sub>2</sub> O | TEOA | UV<br>(254 ≤ λ < 420nm) | 58.41 $\mu\text{mol}\cdot\text{g}^{-1}\cdot\text{h}^{-1}$  | 14        |
| g-C <sub>3</sub> N <sub>4</sub> @UIO66           | MeCN             | TEOA | 300 W Xe lamp           | 9.9 $\mu\text{mol}\cdot\text{g}^{-1}\cdot\text{h}^{-1}$    | 15        |
| ZIS/BCN-1                                        | H <sub>2</sub> O | TEOA | 300 W Xe lamp           | 158 $\mu\text{mol}\cdot\text{g}^{-1}\cdot\text{h}^{-1}$    | 16        |
| BA <sub>20</sub> - CNS - PDA <sub>15</sub>       | MeCN             | TEOA | LED<br>(420nm < λ)      | 158 $\mu\text{mol}\cdot\text{g}^{-1}\cdot\text{h}^{-1}$    | 17        |
| COF@g-C <sub>3</sub> N <sub>4</sub> -0.2         | MeCN             | TEOA | LED<br>(420nm < λ)      | 195 $\mu\text{mol}\cdot\text{g}^{-1}\cdot\text{h}^{-1}$    | This Work |

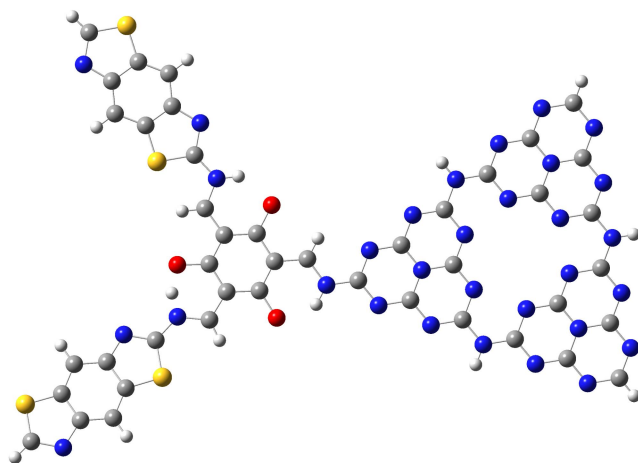

Figure S31. Computational model image for COF@g-C<sub>3</sub>N<sub>4</sub> with a cluster model.

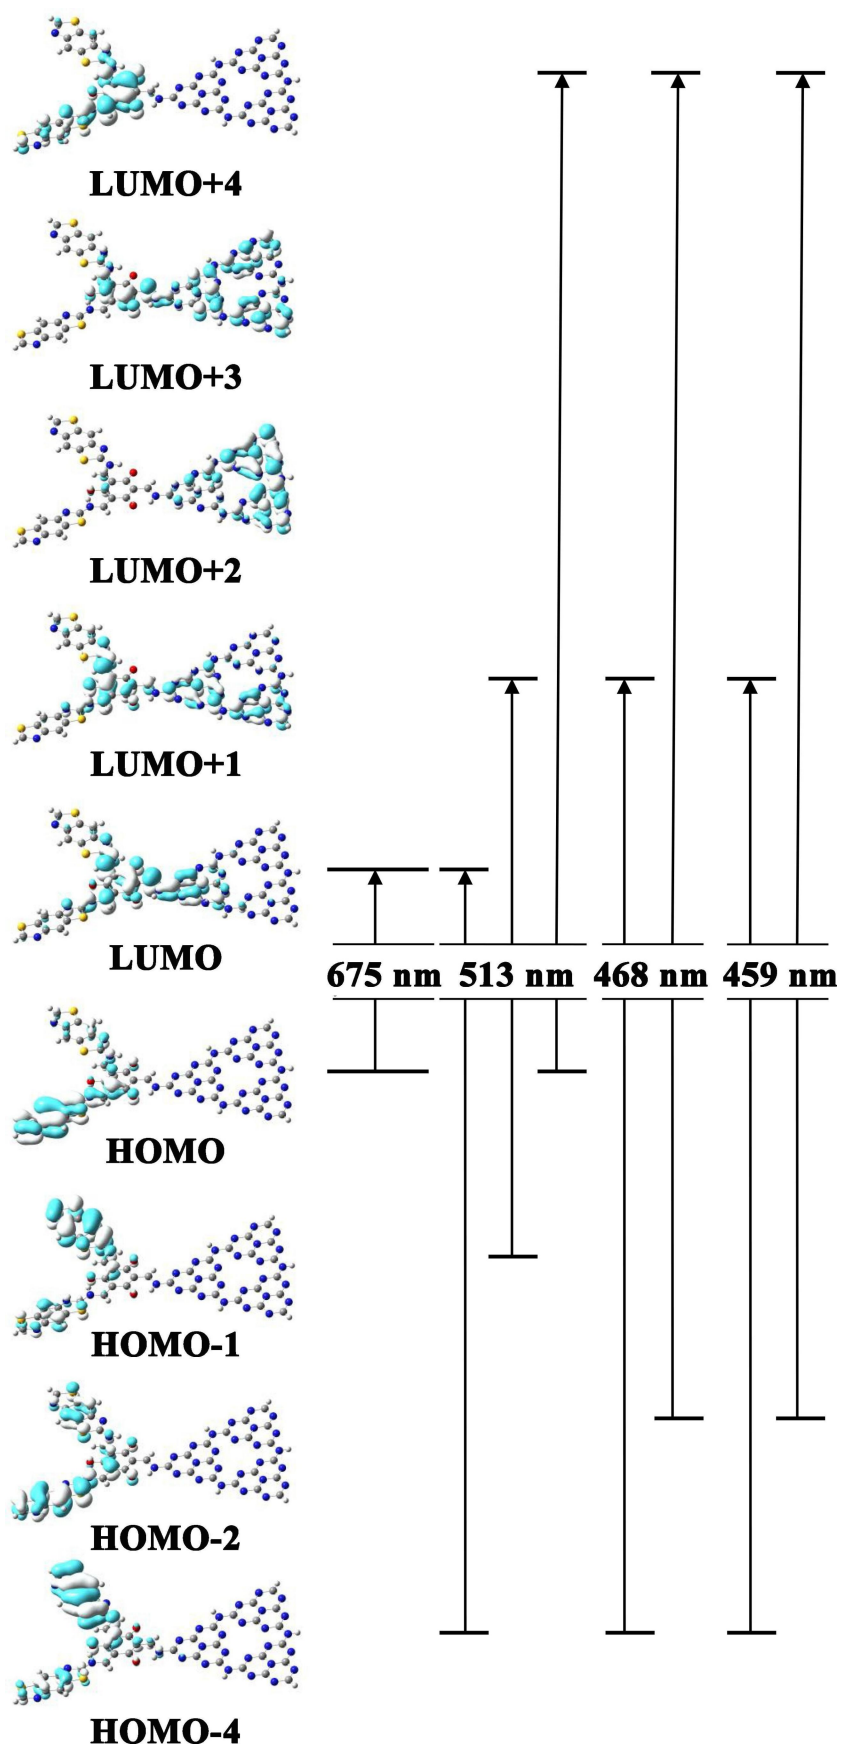

Figure S32. The molecular orbital composition analysis of COF@g-C<sub>3</sub>N<sub>4</sub>.



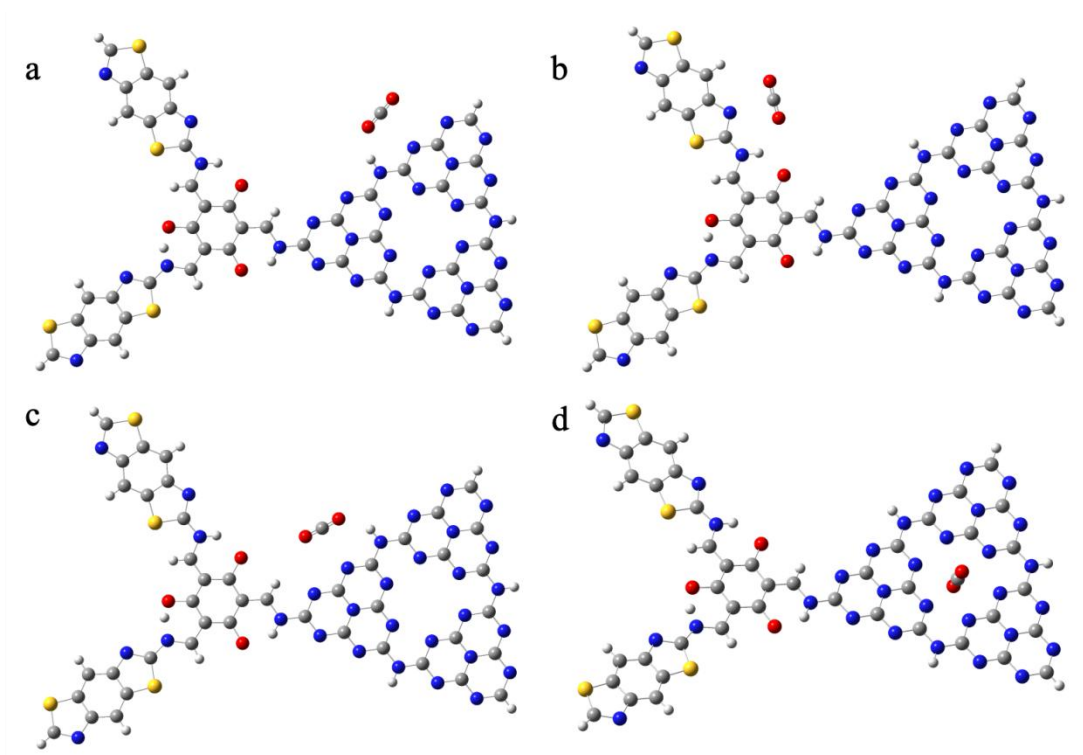

Figure S33. The model plots of CO<sub>2</sub> at adsorption sites **a,b,c,d** on COF@g-C<sub>3</sub>N<sub>4</sub>.([Cat.-CO<sub>2</sub>]-a (-b, -c, -d)).

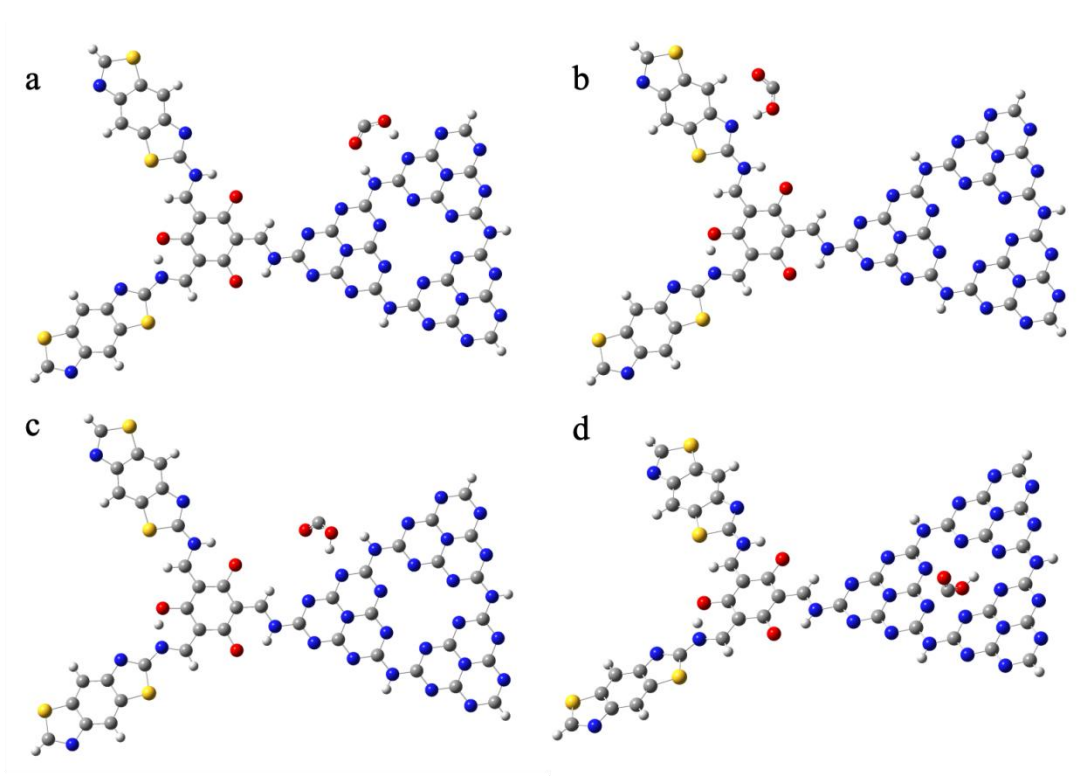

Figure S34. The model plots of -OCO-H at adsorption sites **a,b,c,d** on COF@g-C<sub>3</sub>N<sub>4</sub>.([Cat.-OCO-H]-a (-b, -c, -d)).

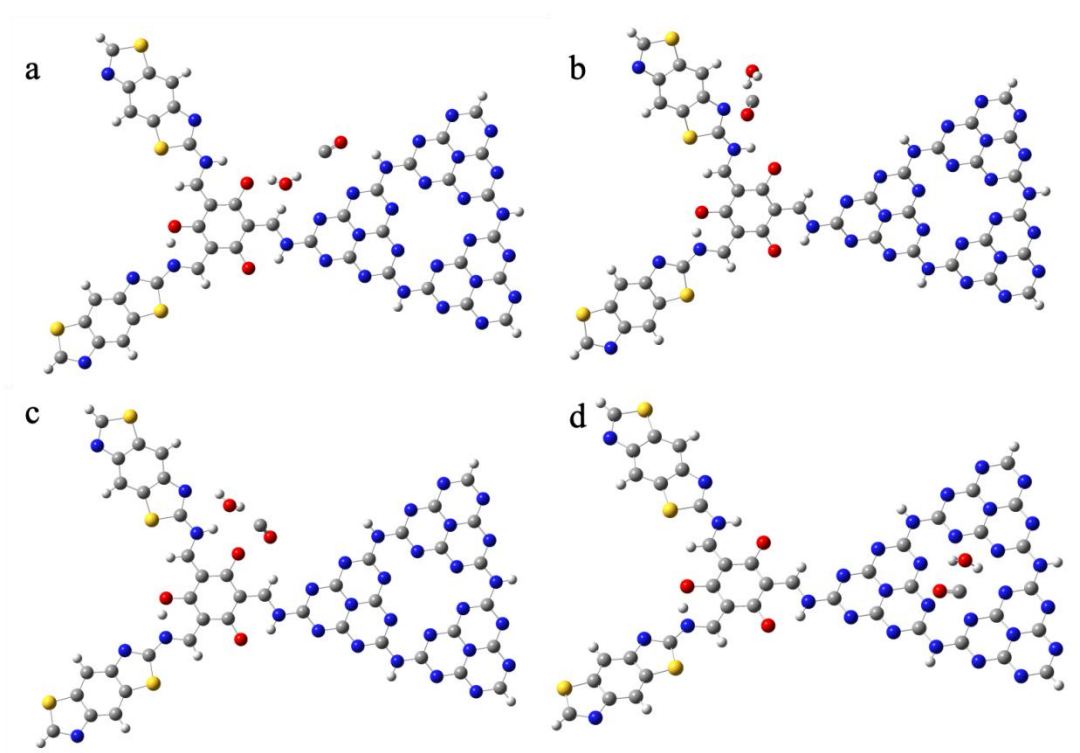

Figure S35. The model plots of  $\text{-CO -H}_2\text{O}$  at adsorption sites **a,b,c,d** on  $\text{COF@g-C}_3\text{N}_4$ .([Cat.-CO -H<sub>2</sub>O]-a (-b, -c, -d)).

- [1] M. Lu, M. Zhang, J. Liu, T. Y. Yu, J. N. Chang, L. J. Shang, S. L. Li, Y. Q. Lan, *J. Am. Chem. Soc.* 2022, **144**, 1861-1871.
- [2] F.-M. Zhang, J.-L. Sheng, Z.-D. Yang, X.-J. Sun, H.-L. Tang, M. Lu, H. Dong, F.-C. Shen, J. Liu, Y.-Q. Lan, *Angew. Chem. Int. Ed.* 2018, **57**, 12106-12110.
- [3] J.-X. Cui, L.-J. Wang, L. Feng, B. Meng, Z.-Y. Zhou, Z.-M. Su, K. Wang, S. Liu, *J. Mater. Chem. A* 2021, **9**, 24895-24902.
- [4] H. Zhong, R. J. Sa, H. W. Lv, S. L. Yang, D. Q. Yuan, X. C. Wang, R. H. Wang, *Adv. Funct. Mater.*, 2020, **30**, 2002654.
- [5] J. Zhou, W. C. Chen, C. Y. Sun, L. Han, C. Qin, M. M. Chen, X. L. Wang, E. B. Wang, Z. M. Su, *J. Mater. Chem. A*, 2018, **6**, 21596.
- [6] J. Wang, H.-Y. Tan, Y. Zhu, H. Chu, H. M. Chen, *Angew. Chem. Int. Ed.* 2021, **60**, 17254-17267.
- [7] K. Kobayashi, T. Kikuchi, S. Kitagawa, K. Tanaka, *Angew. Chem. Int. Ed.* 2014, **53**, 11813-11817.
- [8] H.-Q. Xu, J. Hu, D. Wang, Z. Li, Q. Zhang, Y. Luo, S.-H. Yu, H.-L. Jiang, *J. Am. Chem. Soc.* 2015, **137**, 13440-13443.
- [9] K. Yang, J. Yang, Y. Yesire, K. Zhong, P. Yan, H. Liu, H. Li, Y. Song, M. He and H. Xu, *Sep. Purif. Technol.*, 2024, **341**, 126808.
- [10] P. Chen, B. Lei, X. a. Dong, H. Wang, J. Sheng, W. Cui, J. Li, Y. Sun, Z. Wang and F. Dong, *ACS Nano*, 2020, **14**, 15841-15852.
- [11] J. Zhou, W. Chen, C. Sun, L. Han, C. Qin, M. Chen, X. Wang, E. Wang and Z. Su, *ACS Appl. Mater. Inter.*, 2017, **9**, 11689-11695.
- [12] J. Lin, Z. Pan and X. Wang, *ACS Sustain. Chem. Eng.*, 2014, **2**, 353-358.
- [13] C. Cometto, R. Kuriki, L. Chen, K. Maeda, T.-C. Lau, O. Ishitani and M. Robert, *J. Am. Chem. Soc.*, 2018, **140**, 7437-7440.

- [14] X. Li, X. Song, C. Ma, Y. Cheng, D. Shen, S. Zhang, W. Liu, P. Huo and H. Wang, *ACS Appl. Nano Mater.*, 2020, **3**, 1298-1306.
- [15] L. Shi, T. Wang, H. Zhang, K. Chang and J. Ye, *Adv. Funct. Mater.*, 2015, **25**, 5360-5367.
- [16] K. Y. Kumar, L. Parashuram, M. K. Prashanth, H. Shanavaz, C. B. P. Kumar, V. S. A. Devi, F. Alharethy, B.-H. Jeon and M. S. Raghu, *J. Environ. Chem. Eng.*, 2023, **11**, 110867.
- [17] M. Li, S. Zhang, X. Liu, J. Han, X. Zhu, Q. Ge and H. Wang, *Eur. J. Inorg. Chem.*, 2019, **2019**, 2058-2064.
- [18] M. Gao, L. Sun, C. Ma, X. Li, H. Jiang, D. Shen, H. Wang and P. Huo, *Inorg. Chem.*, 2021, **60**, 1755-1766.
- [19] J. Yang, X. Zhu, Z. Mo, J. Yi, J. Yan, J. Deng, Y. Xu, Y. She, J. Qian, H. Xu and H. Li, *Inorg. Chem. Front.*, 2018, **5**, 3163-3169.
